# Supplementary material
Source: MDPI journal article supplement (https://www.mdpi.com/2073-445X/12/1/192)
Supplement: s1 [file s1]

**Supplementary material Table S1.** Ethnobotanical inventory of the Nizag community

| #  | Species                                         | Native name          | Crop system      | Ethnobotanical use * |    |    |    |    |    |    |    |
|----|-------------------------------------------------|----------------------|------------------|----------------------|----|----|----|----|----|----|----|
|    |                                                 |                      |                  | AL                   | ME | FO | MA | CO | TO | CR | AG |
| 1  | <i>Aphelandra formosa</i> (Bonpl.) Nees         | S/N                  | Unidentified     |                      |    |    |    |    |    |    |    |
| 2  | <i>Saurauia peruviana</i> Buscal.               | Pucañahui            | Unidentified     |                      |    |    |    |    |    |    |    |
| 3  | <i>Cheilanthes bonariensis</i> (Willd.) Proctor | Helecho              | Unidentified     |                      |    |    |    |    |    |    |    |
| 4  | <i>Agave americana</i> L.                       | Cabuya negra         | Cultural Control | X                    | X  |    | X  | X  | X  |    | X  |
| 5  | <i>Furcraea andina</i> Trel.                    | Cabuya blanca        | Cultural Control |                      |    |    | X  |    |    |    | X  |
| 6  | <i>Yucca elephantipes</i> Baker                 | Yuca pie de elefante | Unidentified     |                      |    |    |    |    |    |    |    |
| 7  | <i>Bomarea multiflora</i> (L. f.) Mirb.         | Clavelón             | Unidentified     |                      |    |    |    |    |    |    |    |
| 8  | <i>Bomarea uncifolia</i> Herb.                  | Kinde sungana        | Unidentified     |                      |    |    |    |    |    |    |    |
| 9  | <i>Alternanthera porrigens</i> (Jacq.) Kuntze   | Moradilla            | Cultural Control | X                    | X  |    |    |    |    |    |    |
| 10 | <i>Amaranthus quitensis</i> L.                  | Sanguracha           | Horticulture     | X                    | X  |    |    |    |    | X  | X  |
| 11 | <i>Amaranthus spinosus</i> L.                   | Bledo espinoso       | Cultural Control |                      | X  | X  |    |    |    |    |    |
| 12 | <i>Allium fistulosum</i> L.                     | Cebollín             | Agriculture      | X                    |    |    |    |    |    |    |    |
| 13 | <i>Allium cepa</i> L.                           | Cebolla              | Agriculture      | X                    |    |    |    |    |    |    |    |
| 14 | <i>Allium sativum</i> L.                        | Ajo                  | Agriculture      | X                    |    |    |    |    |    |    |    |
| 15 | <i>Schinus molle</i> L.                         | Molle                | Management       | X                    | X  |    |    |    | X  | X  | X  |
| 16 | <i>Annona cherimola</i> Mill.                   | Chirimoya            | Management       | X                    |    |    |    |    |    |    |    |
| 17 | <i>Coriandrum sativum</i> L.                    | Cilantro             | Horticulture     | X                    |    |    |    |    |    |    |    |
| 18 | <i>Petroselinum crispum</i> Mill.               | Perejil              | Horticulture     | X                    |    |    |    |    |    |    |    |
| 19 | <i>Apium graveolens</i> L.                      | Apio                 | Horticulture     | X                    |    |    |    |    |    |    |    |
| 20 | <i>Foeniculum vulgare</i> Mill.                 | Hinojo               | Horticulture     | X                    |    |    |    |    |    |    |    |
| 21 | <i>Anethum graveolens</i> L.                    | Eneldo               | Horticulture     | X                    |    |    |    |    |    |    |    |
| 22 | <i>Arracacia xanthorrhiza</i> Bancr.            | Racacha              | Management       | X                    | X  | X  |    |    |    |    |    |
| 23 | <i>Daucus montanus</i> Humb. & Bonpl.           | Culantrillo          | Unidentified     |                      |    |    |    |    |    |    |    |
| 24 | <i>Colocasia esculenta</i> (L.) Schott          | Papa china           | Management       | X                    |    |    |    |    |    |    |    |

|    |                                                  |                         |                  |   |   |   |   |
|----|--------------------------------------------------|-------------------------|------------------|---|---|---|---|
| 25 | <i>Oreopanax ecuadorensis</i> Seem.              | Pumamaqui               | Cultural Control |   | X |   |   |
| 26 | <i>Ambrosia arborescens</i> Mill.                | Marcu                   | Cultural Control |   |   | X | X |
| 27 | <i>Baccharis latifolia</i> (Ruiz & Pav.) Pers.   | Chilca                  | Cultural Control |   | X |   | X |
| 28 | <i>Barnadesia spinosa</i> L. f.                  | Shiñan                  | Cultural Control |   | X |   |   |
| 29 | <i>Bidens pilosa</i> L.                          | Amor seco               | Unidentified     |   |   |   |   |
| 30 | <i>Galinsoga parviflora</i> Cav.                 | Pacunga                 | Cultural Control | X |   |   |   |
| 31 | <i>Liabum floribundum</i> Less.                  | Ruldan                  | Cultural Control |   | X |   |   |
| 32 | <i>Munnozia hastifolia</i> Poepp.                | Yaconcilla              | Unidentified     |   |   |   |   |
| 33 | <i>Pappobolus andinus</i> Panero                 | Panero                  | Unidentified     |   |   |   |   |
| 34 | <i>Acmella repens</i> (Walter) Rich.             | Botoncillo              | Cultural Control | X |   |   |   |
| 35 | <i>Verbesina latisquama</i> S.F. Blake           | Urco chilca             | Unidentified     |   |   |   |   |
| 36 | <i>Viguiera quitensis</i> (Benth.) S.F. Blake    | Flor del sol            | Unidentified     |   |   |   |   |
| 37 | <i>Lactuca sativa</i> L.                         | Lechuga                 | Agriculture      | X |   |   |   |
| 38 | <i>Tanacetum parthenium</i> (L.) Sch. Bip.       | Santa maría             | Horticulture     | X |   |   | X |
| 39 | <i>Chamaemelum nobile</i> (L.) All.              | Manzanilla              | Horticulture     | X |   |   |   |
| 40 | <i>Taraxacum officinale</i> L.                   | Taraxaco/Diente de león | Cultural Control | X |   |   |   |
| 41 | <i>Smallanthus sonchifolius</i> (Poepp.) H. Rob. | Jicama/Shicama          | Agriculture      | X | X |   |   |
| 42 | <i>Wedelia grandiflora</i> Benth.                | S/N                     | Unidentified     |   |   |   |   |
| 43 | <i>Xanthium spinosum</i> L.                      | Cashamarucha            | Cultural Control | X |   |   |   |
| 44 | <i>Ullucus tuberosus</i> Caldas                  | Ullucu/melloco          | Agriculture      | X | X |   | X |
| 45 | <i>Alnus acuminata</i> Kunth                     | Aliso                   | Cultural Control |   |   |   | X |
| 46 | <i>Delostoma integrifolium</i> D. Don            | Guailag/Cholán morado   | Cultural Control |   |   |   | X |
| 47 | <i>Tecoma stans</i> (L.) Juss. ex Kunth          | Cholán                  | Cultural Control |   | X |   | X |
| 48 | <i>Wigandia crispa</i> Kunth                     | S/N                     | Unidentified     |   |   |   |   |
| 49 | <i>Brassica rapa</i> L.                          | Nabo                    | Agriculture      | X |   |   |   |
| 50 | <i>Brassica oleracea</i> L.                      | Col                     | Agriculture      | X |   |   |   |
| 51 | <i>Pitcairnia aequatorialis</i> L.B. Sm.         | Sara kiwa               | Unidentified     |   |   |   |   |

|    |                                                |                 |                  |   |   |   |   |
|----|------------------------------------------------|-----------------|------------------|---|---|---|---|
| 52 | <i>Tillandsia incarnata</i> Kunth              | Wicundo         | Unidentified     |   |   |   |   |
| 53 | <i>Tillandsia ionochroma</i> André ex Mez      | Wicundo         | Unidentified     |   |   |   |   |
| 54 | <i>Tillandsia secunda</i> Kunth                | Shawingo        | Unidentified     |   |   |   |   |
| 55 | <i>Armatocereus godingianus</i> Britton & Rose | Cactus          | Unidentified     |   |   |   |   |
| 56 | <i>Armatocereus laetus</i> Kunth               | Cactus          | Unidentified     |   |   |   |   |
| 57 | <i>Austrocylindropuntia cylindrica</i> Lam.    | Cactus          | Unidentified     |   |   |   |   |
| 58 | <i>Austrocylindropuntia subulata</i> Backeb.   | Cactus          | Unidentified     |   |   |   |   |
| 59 | <i>Cleistocactus sepium</i> (Kunth) Weber      | Cactus          | Unidentified     |   |   |   |   |
| 60 | <i>Opuntia aequatorialis</i> Britton & Rose    | Tuna roja       | Cultural Control | X | X |   | X |
| 61 | <i>Opuntia quitensis</i> F.A.C. Weber          | Tuna            | Horticulture     | X | X |   | X |
| 62 | <i>Opuntia ficus-indica</i> (L.) Mill.         | Tuna            | Horticulture     | X | X |   | X |
| 63 | <i>Opuntia soederstromiana</i> Britton & Rose  | Tuna roja       | Cultural Control | X | X |   | X |
| 64 | <i>Opuntia cylindrica</i> (Lam.) DC.           | Cactus          | Unidentified     |   |   |   |   |
| 65 | <i>Echinopsis pachanoi</i> Britton & Rose      | San Pedro       | Cultural Control |   |   | X | X |
| 66 | <i>Senna multiglandulosa</i> Jacq.             | Retama/Mutuy    | Cultural Control |   |   |   | X |
| 67 | <i>Senna spectabilis</i> DC.                   | Mil mil         | Cultural Control |   |   | X |   |
| 68 | <i>Calceolaria tripartita</i> Ruiz & Pav.      | Zapatitos       | Cultural Control |   | X |   |   |
| 69 | <i>Centropogon ferrugineus</i> (L. f.) Gleason | Campanitas      | Unidentified     |   |   |   |   |
| 70 | <i>Canna indica</i> L.                         | Achira          | Management       | X | X |   |   |
| 71 | <i>Sambucus peruviana</i> Kunth                | Sauco           | Horticulture     |   | X |   |   |
| 72 | <i>Carica pubescens</i> Lenné & K. Koch        | Chamburu        | Horticulture     | X |   |   |   |
| 73 | <i>Carica pentagona</i> Heilborn               | Babaco          | Agriculture      | X |   |   |   |
| 74 | <i>Spinacia oleracea</i> L.                    | Espinaca        | Agriculture      | X |   |   |   |
| 75 | <i>Beta vulgaris</i> L.                        | Remolacha       | Agriculture      | X |   |   |   |
| 76 | <i>Chenopodium ambrosioides</i> L.             | Paico           | Horticulture     | X | X | X | X |
| 77 | <i>Chenopodium petiolare</i> Kunth             | Paico silvestre | Cultural Control |   |   | X |   |
| 78 | <i>Beta vulgaris</i> L.                        | Acelga          | Agriculture      | X |   |   |   |

|     |                                               |                    |                  |   |   |   |   |
|-----|-----------------------------------------------|--------------------|------------------|---|---|---|---|
| 79  | <i>Columellia oblonga</i> Ruiz & Pav.         | Reme/Cuasco blanco | Cultural Control |   |   |   | X |
| 80  | <i>Ipomoea batatas</i> (L.) Lam.              | Apichu/Camote      | Management       | X | X |   |   |
| 81  | <i>Coriaria ruscifolia</i> L.                 | Piñan/shanshi      | Cultural Control |   |   |   | X |
| 82  | <i>Cucurbita ficifolia</i> Bouché             | Sambo              | Agriculture      | X |   |   | X |
| 83  | <i>Cucurbita maxima</i> Duchesne              | Zapallo            | Agriculture      | X |   |   | X |
| 84  | <i>Cyclanthera pedata</i> (L.) Schrad.        | Achuqcha/Achogcha  | Horticulture     | X |   |   |   |
| 85  | <i>Cupressus sempervirens</i> L.              | Ciprés             | Management       |   |   | X | X |
| 86  | <i>Carex pichinchensis</i> Kunth              | Yana cortadera     | Cultural Control |   |   | X |   |
| 87  | <i>Carex crinalis</i> Boott                   | Cortadera          | Cultural Control |   |   | X |   |
| 88  | <i>Cyperus aggregatus</i> (Willd.) Endl.      | Cortadera          | Cultural Control |   |   | X |   |
| 89  | <i>Arachniodes denticulata</i> (Sw.) Ching    | Helecho perejil    | Unidentified     |   |   |   |   |
| 90  | <i>Vallea stipularis</i> L. f.                | Sacha capulí       | Cultural Control |   | X |   |   |
| 91  | <i>Equisetum bogotense</i> Kunth              | Cola de caballo    | Cultural Control |   | X |   |   |
| 92  | <i>Vaccinium floribundum</i> Kunth            | Mortino            | Cultural Control | X |   |   |   |
| 93  | <i>Escallonia myrtilloides</i> L. f.          | Pagoda             | Unidentified     |   |   |   |   |
| 94  | <i>Escallonia pendula</i> (Ruiz & Pav.) Pers. | Igña               | Cultural Control |   |   |   | X |
| 95  | <i>Croton elegans</i> Kunth                   | Mosquera           | Cultural Control |   |   |   | X |
| 96  | <i>Ricinus communis</i> L.                    | Higuerilla         | Cultural Control |   | X |   |   |
| 97  | <i>Euphorbia laurifolia</i> Juss. ex Lam.     | Lechero/Pinllo     | Cultural Control |   |   |   | X |
| 98  | <i>Hyeronima macrocarpa</i> Müll. Arg.        | Motilón            | Cultural Control |   |   |   | X |
| 99  | <i>Manihot esculenta</i> Crantz               | Yuca               | Agriculture      | X |   |   |   |
| 100 | <i>Coursetia grandiflora</i> Benth.           | S/N                | Unidentified     |   |   |   |   |
| 101 | <i>Erythrina edulis</i> Pos.-Arang.           | Porotón/Camporoto  | Cultural Control | X |   |   |   |
| 102 | <i>Desmodium molliculum</i> (Kunth) DC.       | Hierba infante     | Cultural Control |   | X |   |   |
| 103 | <i>Macroptilium atropurpureum</i> (DC.) Urb.  | Fréjol de monte    | Cultural Control | X |   |   |   |
| 104 | <i>Phaseolus vulgaris</i> L.                  | Fréjol/Purutu      | Agriculture      | X |   |   | X |
| 105 | <i>Lupinus mutabilis</i> Sweet                | Tarwi/Chocho       | Agriculture      | X |   |   | X |

|     |                                               |                       |                  |   |   |   |
|-----|-----------------------------------------------|-----------------------|------------------|---|---|---|
| 106 | <i>Lupinus microphyllus</i> Desr.             | Ashpa chocho          | Unidentified     |   |   |   |
| 107 | <i>Lupinus ramosissimus</i> Benth.            | Ashpa chocho          | Unidentified     |   |   |   |
| 108 | <i>Medicago sativa</i> L.                     | Alfalfa               | Agriculture      |   | X |   |
| 109 | <i>Medicago polymorpha</i> L.                 | Alfalfa de secano     | Cultural Control |   | X |   |
| 110 | <i>Caesalpinia spinosa</i> (Molina) Kuntze    | Llangas/Guarango      | Cultural Control | X |   | X |
| 111 | <i>Vicia sativa</i> L.                        | Vicia                 | Agriculture      | X |   |   |
| 112 | <i>Lens culinaris</i> Medik.                  | Lenteja               | Agriculture      | X |   |   |
| 113 | <i>Vicia faba</i> L.                          | Haba                  | Agriculture      | X |   |   |
| 114 | <i>Trifolium amabile</i> Kunth                | Trébol silvestre      | Unidentified     |   |   |   |
| 115 | <i>Trifolium repens</i> L.                    | Trébol blanco         | Agriculture      |   | X |   |
| 116 | <i>Pisum sativum</i> L.                       | Arverja               | Agriculture      | X |   |   |
| 117 | <i>Inga insignis</i> Kunth                    | Guaba                 | Management       | X |   | X |
| 118 | <i>Gunnera magellanica</i> Lam.               | Orejuela              | Unidentified     |   |   |   |
| 119 | <i>Juglans neotropica</i> Diels               | Tocte/Nogal           | Management       | X |   | X |
| 120 | <i>Thymus vulgaris</i> L.                     | Tomillo               | Horticulture     |   | X |   |
| 121 | <i>Minthostachys mollis</i> Griseb.           | Poleo/Muña            | Horticulture     |   | X |   |
| 122 | <i>Marrubium vulgare</i> L.                   | Toronjil cuyano       | Horticulture     |   | X |   |
| 123 | <i>Salvia quitensis</i> Benth.                | Kinti tsunkana/Salvia | Unidentified     |   |   |   |
| 124 | <i>Rosmarinus officinalis</i> L.              | Romero                | Horticulture     |   | X |   |
| 125 | <i>Hyptis suaveolens</i> L.                   | Chan                  | Cultural Control |   | X |   |
| 126 | <i>Lepechinia betonicifolia</i> (Lam.) Epling | Matico/Salvia real    | Cultural Control |   | X |   |
| 127 | <i>Mentha suaveolens</i> Ehrh.                | Menta                 | Horticulture     |   | X |   |
| 128 | <i>Persea americana</i> Mill.                 | Aguacate              | Management       | X |   | X |
| 129 | <i>Lavatera arborea</i> L.                    | Malva blanca          | Horticulture     |   | X | X |
| 130 | <i>Sida rhombifolia</i> L.                    | Escobilla             | Cultural Control |   | X |   |
| 131 | <i>Malva sylvestris</i> L.                    | Malva                 | Horticulture     |   | X |   |
| 132 | <i>Byttneria obtusata</i> Benth. ex Hochr.    | Sacha malva           | Unidentified     |   |   |   |

|     |                                                 |                       |                  |   |   |  |   |   |
|-----|-------------------------------------------------|-----------------------|------------------|---|---|--|---|---|
| 133 | <i>Fuertesimalva limensis</i> (L.) Fryxell      | Malva silvestre       | Unidentified     |   |   |  |   |   |
| 134 | <i>Miconia bullata</i> (Turcz.) Triana          | Sierra/Colca          | Unidentified     |   |   |  |   |   |
| 135 | <i>Miconia papillosa</i> (Desr.) Naudin         | Yanasacha             | Cultural Control |   | X |  |   |   |
| 136 | <i>Acacia melanoxylon</i> R. Br.                | Acacia negra          | Cultural Control |   |   |  | X |   |
| 137 | <i>Ficus carica</i> L.                          | Higo                  | Horticulture     | X | X |  |   |   |
| 138 | <i>Morus insignis</i> Bureau                    | Morera                | Cultural Control | X | X |  |   |   |
| 139 | <i>Musa acuminata</i> Colla                     | Plátano               | Horticulture     | X |   |  |   |   |
| 140 | <i>Psidium guajava</i> L.                       | Guayaba               | Management       | X |   |  |   |   |
| 141 | <i>Eucalyptus globulus</i> Labill.              | Eucalipto             | Management       | X | X |  | X | X |
| 142 | <i>Myrcianthes Hallii</i> (O. Berg) McVaugh     | Arrayan andino        | Management       | X |   |  |   |   |
| 143 | <i>Fuchsia loxensis</i> Kunth                   | Zarcillo              | Cultural Control |   | X |  |   |   |
| 144 | <i>Oxalis rufescens</i> Turcz                   | Trebol silvestre      | Unidentified     |   |   |  |   |   |
| 145 | <i>Oxalis corniculata</i> L.                    | Aleluya               | Unidentified     |   |   |  |   |   |
| 146 | <i>Oxalis lotoides</i> Kunth                    | Trebol/Vinagrera      | Unidentified     |   |   |  |   |   |
| 147 | <i>Oxalis tuberosa</i> Molina                   | Oca                   | Agriculture      | X | X |  |   | X |
| 148 | <i>Oxalis corniculata</i> L.                    | Acedera               | Unidentified     |   |   |  |   |   |
| 149 | <i>Argemone subfusiformis</i> G.B. Ownbey       | Cardo santo           | Cultural Control |   | X |  |   | X |
| 150 | <i>Papaver rhoeas</i> L.                        | Amapola silvestre     | Unidentified     |   |   |  | X |   |
| 151 | <i>Passiflora cumbalensis</i> (H. Karst.) Harms | Taxo/Gullán           | Horticulture     | X |   |  |   |   |
| 152 | <i>Passiflora ligularis</i> Juss.               | Granadilla            | Horticulture     | X |   |  |   |   |
| 153 | <i>Passiflora ampullacea</i> (Mast.) Harms      | Taxo silvestre/Gullán | Horticulture     | X |   |  |   |   |
| 154 | <i>Passiflora coactilis</i> (Mast.) Killip      | Granadilla            | Horticulture     | X |   |  |   |   |
| 155 | <i>Passiflora pinnatistipula</i> Cav.           | Granadilla            | Horticulture     | X |   |  |   |   |
| 156 | <i>Passiflora alnifolia</i> Kunth               | Granadilla            | Cultural Control | X |   |  |   |   |
| 157 | <i>Passiflora mixta</i> L. f.                   | Taxo                  | Horticulture     | X |   |  |   |   |
| 158 | <i>Passiflora manicata</i> (Juss.) Pers.        | Taxo                  | Cultural Control | X |   |  |   |   |
| 159 | <i>Peperomia galioides</i> Kunth                | Congona de monte      | Unidentified     |   |   |  |   |   |

|     |                                                   |                       |                  |   |   |   |   |   |
|-----|---------------------------------------------------|-----------------------|------------------|---|---|---|---|---|
| 160 | <i>Piper barbatum</i> Kunth                       | Chililin              | Cultural Control | X |   |   |   |   |
| 161 | <i>Piper aduncum</i> L.                           | Matico                | Cultural Control | X |   |   |   |   |
| 162 | <i>Plantago major</i> L.                          | Llanten               | Horticulture     | X |   |   |   |   |
| 163 | <i>Plantago linearis</i> Kunth                    | Llánten andino        | Cultural Control | X | X |   |   |   |
| 164 | <i>Arundo donax</i> L.                            | Carrizo               | Cultural Control |   |   |   |   | X |
| 165 | <i>Calamagrostis intermedia</i> (J. Presl) Steud. | Paja                  | Cultural Control |   |   |   |   | X |
| 166 | <i>Cortaderia nitida</i> (Kunth) Pilg.            | Sigse                 | Cultural Control |   |   |   |   | X |
| 167 | <i>Holcus lanatus</i> L.                          | Pasto holco           | Agriculture      |   |   |   | X |   |
| 168 | <i>Triticum aestivum</i> L.                       | Trigo                 | Agriculture      | X |   |   |   |   |
| 169 | <i>Hordeum vulgare</i> L.                         | Cebada                | Agriculture      | X |   |   |   |   |
| 170 | <i>Bromus catharticus</i> Vahl                    | Cebadilla             | Agriculture      |   |   |   | X |   |
| 171 | <i>Pennisetum clandestinum</i> Hochst.            | Kikuyo                | Cultural Control |   |   |   | X |   |
| 172 | <i>Zea mays</i> L.                                | Sara/Maíz             | Agriculture      | X | X | X | X | X |
| 173 | <i>Pennisetum purpureum</i> Schumach.             | Hierba elefante       | Agriculture      |   |   |   | X |   |
| 174 | <i>Saccharum officinarum</i> L.                   | Caña de azúcar        | Agriculture      | X |   |   |   | X |
| 175 | <i>Muehlenbeckia tamnifolia</i> (Kunth) Meisn.    | S/N                   | Unidentified     |   |   |   |   |   |
| 176 | <i>Rumex obtusifolius</i> L.                      | Lengua de vaca/Gulak  | Cultural Control |   |   |   | X |   |
| 177 | <i>Rumex andinus</i> Rech. f.                     | GulaK                 | Cultural Control |   | X | X |   |   |
| 178 | <i>Campyloneurum cochense</i> (Hieron.) Ching     | Calaguala             | Cultural Control |   | X |   |   |   |
| 179 | <i>Anagallis arvensis</i> L.                      | Murrajes              | Unidentified     |   |   |   |   |   |
| 180 | <i>Myrsine coriacea</i> Sw.                       | Yubar                 | Cultural Control |   | X |   |   |   |
| 181 | <i>Adiantum capillus-veneris</i> L.               | Culantrillo del monte | Cultural Control |   | X |   |   |   |
| 182 | <i>Cheilanthes covillei</i> Maxon                 | Helecho               | Unidentified     |   |   |   |   |   |
| 183 | <i>Rubus glaucus</i> Benth.                       | Mora castilla         | Horticulture     | X |   |   |   |   |
| 184 | <i>Rubus roseus</i> Poir                          | Mora silvestre        | Management       | X |   |   |   |   |
| 185 | <i>Fragaria vesca</i> L.                          | Frutilla de monte     | Agriculture      | X |   |   |   |   |

|     |                                                 |                          |                  |   |   |   |   |   |
|-----|-------------------------------------------------|--------------------------|------------------|---|---|---|---|---|
| 186 | <i>Fragaria</i> × <i>ananassa</i> hort.         | Frutilla                 | Agriculture      | X |   |   |   |   |
| 187 | <i>Hesperomeles obtusifolia</i> (Pers.) Lindl.  | Cerote                   | Cultural Control |   |   |   | X |   |
| 188 | <i>Prunus serotina</i> Ehrh.                    | Capulí                   | Management       | X | X | X |   | X |
| 189 | <i>Prunus domestica</i> L.                      | Claudia                  | Horticulture     | X |   |   |   |   |
| 190 | <i>Lachemilla andina</i> (L.M. Perry) Rothm.    | S/N                      | Unidentified     |   |   |   |   |   |
| 191 | <i>Prunus persica</i> (L.) Batsch               | Durazno                  | Horticulture     | X |   |   |   |   |
| 192 | <i>Arcytophyllum thymifolium</i> Ruiz & Pav.    | Urañan                   | Cultural Control |   | X |   |   |   |
| 193 | <i>Sherardia arvensis</i> L.                    | S/N                      | Unidentified     |   |   |   |   |   |
| 194 | <i>Citrus limon</i> (L.) Burm. f.               | Limón                    | Horticulture     | X |   |   |   |   |
| 195 | <i>Citrus x sinensis</i> (L.) Osbeck            | Naranja                  | Horticulture     | X |   |   |   |   |
| 196 | <i>Ruta graveolens</i> L.                       | Ruda                     | Horticulture     |   | X |   |   | X |
| 197 | <i>Dodonea viscosa</i> (L.) Jacq.               | Chamana                  | Cultural Control |   |   |   |   | X |
| 198 | <i>Salix humboldtiana</i> Willd.                | Sauce andino/Wayao       | Cultural Control |   |   |   | X | X |
| 199 | <i>Pouteria lucuma</i> (Ruiz & Pav.) Kuntze     | Lucma/Lúcuma             | Management       | X |   |   |   | X |
| 200 | <i>Calceolaria hyssopifolia</i> Kunth           | Zapatitos                | Cultural Control |   | X |   |   |   |
| 201 | <i>Buddleja americana</i> L.                    | Guacracaya/Salvia        | Cultural Control |   | X |   |   |   |
| 202 | <i>Buddleja incana</i> Ruiz & Pav.              | Quishuar                 | Cultural Control |   | X |   |   |   |
| 203 | <i>Cestrum chimborazinum</i> Francey            | Sauco silvestre          | Horticulture     |   | X |   |   |   |
| 204 | <i>Iochroma cyaneum</i> Lindl.                  | Sacha pepino             | Unidentified     |   |   |   |   |   |
| 205 | <i>Solanum nigrescens</i> M. Martens & Galeotti | Hierba mora              | Cultural Control |   | X |   |   |   |
| 206 | <i>Solanum americanum</i> Mill.                 | Hierba mora              | Cultural Control |   | X |   |   |   |
| 207 | <i>Solanum lycopersicum</i> Lam.                | Tomatillo                | Cultural Control | X |   |   |   |   |
| 208 | <i>Lycopersicum esculentum</i> Mill.            | Tomate de carne          | Horticulture     | X |   |   |   |   |
| 209 | <i>Lycopersicon hirsutum</i> Dunal              | Tomate silvestre/Zimbalo | Cultural Control | X |   |   |   |   |
| 210 | <i>Solanum betaceum</i> Cav.                    | Tomate de árbol          | Horticulture     | X |   |   |   |   |
| 211 | <i>Nicotiana tabacum</i> L.                     | Tabaco                   | Agriculture      |   |   |   |   | X |



|     |                                             |                         |                  |   |   |   |   |   |
|-----|---------------------------------------------|-------------------------|------------------|---|---|---|---|---|
| 212 | <i>Nicotiana glauca</i> Graham              | Tabaco silvestre        | Horticulture     |   |   |   |   | X |
| 213 | <i>Brugmansia arborea</i> (L.) Lagerh.      | Huantuk blanco          | Horticulture     |   |   |   |   | X |
| 214 | <i>Brugmansia sanguinea</i> Ruiz & Pav.     | Huantuk rojo            | Cultural Control |   |   |   |   | X |
| 215 | <i>Lycianthes lycioides</i> (L.) Hassl.     | S/N                     | Unidentified     |   |   |   |   |   |
| 216 | <i>Datura stramonium</i> L.                 | Chamico                 | Cultural Control |   |   |   |   | X |
| 217 | <i>Nicandra physalodes</i> (L.) Gaertn.     | Mamasara                | Unidentified     |   |   |   |   | X |
| 218 | <i>Solanum tuberosum</i> L.                 | Papa                    | Agriculture      | X |   |   |   | X |
| 219 | <i>Capsicum pubescens</i> Ruiz & Pav.       | Ají rocoto/ Rukutu uchú | Horticulture     | X |   |   |   | X |
| 220 | <i>Capsicum baccatum</i> L.                 | Aji/Mishqui uchú        | Horticulture     | X |   |   |   | X |
| 221 | <i>Solanum muricatum</i> Aiton              | Pepino/Cachum           | Agriculture      |   |   |   |   |   |
| 222 | <i>Physalis peruviana</i> L.                | Uvilla/Uchuba           | Horticulture     | X |   |   |   |   |
| 223 | <i>Physalis pubescens</i> L.                | Sacha uvilla            | Unidentified     |   |   |   |   |   |
| 224 | <i>Solanum villosum</i> Forssk.             | Uyalin                  | Cultural Control |   |   | X | X |   |
| 225 | <i>Macrothelypteris torresiana</i> Gaudich. | Helecho                 | Unidentified     |   |   |   |   |   |
| 226 | <i>Tilia platyphyllos</i> Scop.             | Tilo                    | Horticulture     |   | X |   |   |   |
| 227 | <i>Tropaeolum tuberosum</i> Ruiz & Pav.     | Mashua/mashwa           | Agriculture      | X | X |   |   | X |
| 228 | <i>Tropaeolum pendulum</i> Klotzsch         | Mashua silvestre        | Unidentified     |   |   |   |   |   |
| 229 | <i>Boehmeria celtidifolia</i> Kunth         | Ortiguilla/Sacha ortiga | Unidentified     |   |   |   |   |   |
| 230 | <i>Urtica dioica</i> L.                     | Ortiga negra            | Cultural Control |   | X |   |   | X |
| 231 | <i>Phenax rugosus</i> (Poir.) Wedd.         | Ortiga blanca           | Cultural Control |   | X |   |   | X |
| 232 | <i>Lantana camara</i> L.                    | Supirrosa silvestre     | Unidentified     |   |   |   |   |   |
| 233 | <i>Verbena litoralis</i> Kunth              | Verbena                 | Cultural Control |   | X |   |   |   |
| 234 | <i>Aloysia citrodora</i> Paláu              | Cedrón                  | Horticulture     |   | X |   |   |   |
| 235 | <i>Aloe vera</i> (L.) Burm. f.              | Sábila                  | Horticulture     |   | X |   |   | X |
| 236 | <i>Sonchus oleraceus</i> L.                 | Canayuyo                | Horticulture     | X |   |   |   |   |
| 237 | <i>Peperomia peltigera</i> C. DC.           | Pata cuyuyu             | Cultural Control |   |   | X |   |   |

\***Note:** AL (food), ME (medicinal), FO (forage), MA (materials), CO (fuel), TO (toxic), CR (ceremonial/ritual) and AG (agroecological)
