# Supplementary material
Source: MDPI journal article supplement (https://www.mdpi.com/2073-445X/12/1/192)
Supplement: s1 [file s1]

**Supplementary material Table S2.** Archaeological and modern macrobotanical assemblages derived from agroecological practices in the Joyagzhí terraces and Nizag community

| Functions /<br>Techniques               | Agroecological practices                                                                | Taxa identified in the macrobotanical assemblages                                                                                                                                                                              |                                                                                                                                                                               |
|-----------------------------------------|-----------------------------------------------------------------------------------------|--------------------------------------------------------------------------------------------------------------------------------------------------------------------------------------------------------------------------------|-------------------------------------------------------------------------------------------------------------------------------------------------------------------------------|
|                                         |                                                                                         | Archaeological context                                                                                                                                                                                                         | Ethnobotanical context                                                                                                                                                        |
| <b>Soil conservation</b>                |                                                                                         |                                                                                                                                                                                                                                |                                                                                                                                                                               |
| Organic fertilization                   | Production of green manures for <i>Zea mays</i> crops                                   | <i>Phaseolus vulgaris</i> , <i>Lupinus mutabilis</i> , <i>Vicia andicola</i> and <i>Trifolium amabile</i>                                                                                                                      | <i>P. vulgaris</i> and <i>L. mutabilis</i>                                                                                                                                    |
|                                         | Cover crops                                                                             | <i>Calandrinia ciliata</i> , <i>Arenaria lanuginosa</i> , <i>Oxalis latifolia</i> , <i>Rumex andinus</i> , <i>Urtica leptophylla</i> , <i>Verbena litoralis</i> and <i>Plantago linearis</i>                                   | <i>Cucurbita</i> spp. and <i>Calandrinia ciliata</i> for <i>Z. mays</i> crops<br><br><i>Amaranthus quitensis</i> and <i>Phenax rugosus</i> for <i>Solanum tuberosum</i> crops |
| Erosion control                         | Crop diversification                                                                    | <i>Z. mays</i> – <i>L. mutabilis</i> – <i>P. vulgaris</i>                                                                                                                                                                      | <i>Z. mays</i> – <i>L. mutabilis</i> – <i>P. vulgaris</i> – <i>Cucurbita maxima</i> – <i>C. ficifolia</i>                                                                     |
|                                         |                                                                                         | <i>Dysphania ambrosioides</i> - <i>Chenopodium petiolare</i> - <i>Amaranthus spinosus</i>                                                                                                                                      | <i>S. tuberosum</i> – <i>D. ambrosioides</i> – <i>A. quitensis</i>                                                                                                            |
|                                         | Redeposition of organic soil in terraces of the Quechua area                            | Depositional sequences of macrobotanical assemblages                                                                                                                                                                           | <i>Ullucus tuberosus</i> - <i>Oxalis tuberosa</i> - <i>Tropaeolum tuberosum</i><br>Macrobotanical palimpsests                                                                 |
|                                         | Construction of terraces in the Quechua area                                            | <i>Z. mays</i>                                                                                                                                                                                                                 | <i>Z. mays</i>                                                                                                                                                                |
| <b>Conservation of agrobiodiversity</b> |                                                                                         |                                                                                                                                                                                                                                |                                                                                                                                                                               |
| Control of pests and diseases           | Burning infected crops                                                                  | <i>Z. mays</i> , <i>P. vulgaris</i> and <i>L. mutabilis</i> in permanent fields and terraces of the Quechua zone                                                                                                               | <i>Z. mays</i> and <i>L. mutabilis</i> in permanent fields of the Yunga and Quechua agroecological zones                                                                      |
|                                         | Trap plant crops                                                                        | <i>Nicandra physalodes</i> for <i>Z. mays</i> crops                                                                                                                                                                            | <i>N. physalodes</i> for <i>Z. mays</i> crops                                                                                                                                 |
| <b>Water supply</b>                     |                                                                                         |                                                                                                                                                                                                                                |                                                                                                                                                                               |
| Water retention                         | Construction of terraces in the Quechua agroecological zone for crops of <i>Z. mays</i> | <i>Z. mays</i>                                                                                                                                                                                                                 | <i>Z. mays</i>                                                                                                                                                                |
| <b>Climate resilience</b>               |                                                                                         |                                                                                                                                                                                                                                |                                                                                                                                                                               |
| Plant barriers                          | Shrub barriers                                                                          | <i>Armatocereus godingianus</i> , <i>Cavendishia bracteata</i> , <i>Cyperus aggregatus</i> , <i>Passiflora ampullacea</i> , <i>Passiflora</i> sp., <i>Phytolacca rivinoides</i> , <i>Rubus roseus</i> and <i>Vaccinium</i> sp. | <i>Agave americana</i> , <i>Echinopsis pachanoi</i> and <i>A. laetus</i>                                                                                                      |
|                                         | Intra-crop barriers for the protection of <i>Z. mays</i>                                | <i>L. mutabilis</i>                                                                                                                                                                                                            | <i>L. mutabilis</i>                                                                                                                                                           |
